# Supplementary material for: Hypoxia-inducible erythropoietin expression: details matter
Source: PubMed Central journal article supplement — Haematologica. 2020 Dec 1;105(12):2704–6. doi: 10.3324/haematol.2020.261966 (PMC7716268; doi:10.3324/haematol.2020.261966), 2020-12-01
Supplement: 2020_261966-Disclosure.pdf [file 2020_261966-Disclosure.pdf]

Haematologica  
HAEMATOL/2020/261966  
Version 1

Hypoxia-inducible erythropoietin expression: details matter

Thomas Kietzmann

Disclosures: TK was supported by the Academy of Finland SA296027, the Jane and Aatos Erkkö Foundation, the Finnish Cancer Foundation, the Sigrid Juselius Foundation, the University of Oulu, and Biocenter Oulu.
